# Supplementary material for: Metal uptake and distribution in the zebrafish (Danio rerio) embryo: differences between nanoparticles and metal ions
Source: Royal Society of Chemistry journal article supplement (doi:10.1039/c6en00440g), 2017-01-01
Supplement: c6en00440g1.pdf [file c6en00440g1.pdf]

1 **Supplemental Information**

2

3 **Metal accumulation and distribution in the zebrafish (*Danio rerio*) embryo:**  
4 **differences between nanoparticles and metal ions**

5

6 Steffi Böhme<sup>1#</sup>, Marta Baccaro<sup>1+</sup>, Matthias Schmidt<sup>3</sup>, Annegret Potthoff<sup>4</sup>, Hans-Joachim Stärk<sup>2</sup>,  
7 Thorsten Reemtsma<sup>2</sup>, Dana Kühnel<sup>1\*</sup>

8

9 <sup>1</sup> Helmholtz Centre for Environmental Research - UFZ, Department Bioanalytical Ecotoxicology,  
10 Permoserstrasse 15, 04318 Leipzig (Germany)

11 <sup>2</sup> University of Siena, Department of Physical Science, Earth and Environment, Via Mattioli 4, 53100  
12 Siena (Italy)

13 <sup>3</sup> Helmholtz Centre for Environmental Research - UFZ, Department Isotope Biogeochemistry,  
14 Permoserstrasse 15, 04318 Leipzig (Germany)

15 <sup>4</sup> Fraunhofer Institute for Ceramic Technologies and Systems - IKTS, Department of Powder and  
16 Suspension Characterization, Winterbergstrasse 28, 01277 Dresden (Germany)

17 <sup>5</sup> Helmholtz Centre for Environmental Research - UFZ, Department of Analytical Chemistry,  
18 Permoserstrasse 15, 04318 Leipzig (Germany)

19

20 # current address: RIKILT (Wageningen University & Research Centre), Akkermaalsbos 2, 6708 WB  
21 Wageningen, The Netherlands

22 + Division of Toxicology, Wageningen University, Stippeneng 4, 6708 WE Wageningen, The  
23 Netherlands

24

25 \* Correspondence: [dana.kuehnel@ufz.de](mailto:dana.kuehnel@ufz.de)

26

27 Keywords: quantification, Laser Ablation ICP-MS, visualization, particle solubility, ionic fraction

28

29

30 A comparison between nominal and real exposure concentrations at the start of the experiment  
 31 measured by neb-ICP-MS is shown in **Tab. S1**. Loss of substance from the exposure solutions may  
 32 result from adsorption, agglomeration and degradation of particles taking place during handling and  
 33 storage of suspensions.

34

35 **Tab. S1:** Comparison between nominal and measured nanoparticle exposure concentrations.

| Nominal NP exposure concentrations | Real NP exposure concentrations | Recovery |
|------------------------------------|---------------------------------|----------|
| 60 µg Ag/L                         | 16.2 µg Ag/L                    | 27 %     |
| 60 µg Au/L                         | 34.2 µg Au/L                    | 57 %     |
| 60 µg Cu/L                         | 52 µg Cu/L                      | 87 %     |
| 60 µg Zn/L                         | 55.5 µg Zn/L                    | 93 %     |

36

### 37 Quantification of total element concentrations

### 38 Visualization by Laser Ablation ICP-MS

39 Prior to the testing of the NPs, untreated organisms were investigated to obtain information on the  
 40 natural background of the respective elements after digestion (**SI, Tab. S2**) and for LA-ICP-MS (**SI,**  
 41 **Fig. S1**). The background values were subtracted from all subsequent measurements.

42

43 **Tab. S2:** Natural background of respective elements obtained by neb-ICP-MS measurement of untreated  
 44 individual organisms (control) after digestion.

| Nanomaterial | Concentration egg<br>(ng/organism) | Concentration chorion<br>(ng/chorion) | Concentration embryo<br>(ng/embryo) |
|--------------|------------------------------------|---------------------------------------|-------------------------------------|
| Ag-NP        | 0.12 ± 0.01                        | 0.12 ± 0.01                           | 0.11 ± 0.01                         |
| Au-NP        | 0.20 ± 0.01                        | 0.18 ± 0.02                           | 0.11 ± 0.01                         |
| CuO-NP       | 1.81 ± 0.23                        | 1.06 ± 0.17                           | 0.54 ± 0.18                         |
| ZnO-NP       | 2.73 ± 0.84                        | 2.88 ± 0.94                           | 2.65 ± 0.31                         |

45

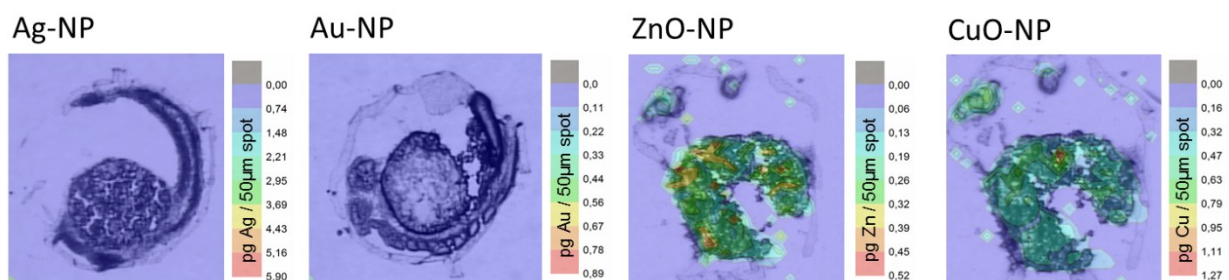

46 **Fig. S1:** Natural background of respective elements obtained by LA-ICP-MS measurement of untreated  
 47 organisms (control).

## 48 **Results**

### 49 Characterization of nanoparticle powders, suspensions, and exposure solutions

50 The hydrodynamic particle sizes measured for the exposure solutions in ISO-WATER differ in the  
51 following range:  $18 \pm 2$  nm (Au-NP) <  $80 \pm 1$  nm (ZnO-NP) <  $117 \pm 24$  nm (Ag-NP) <  $132 \pm 2$  nm  
52 (CuO-NP) at the start of the experiments. After 24 h exposure, sizes of 204 nm (Ag-NP), 420 nm  
53 (CuO-NP), and > 5000 nm for Au and ZnO-NPs were measured in the exposure solutions, indicating a  
54 high agglomeration of particles within the media. The dissolved fraction of the respective particle  
55 solutions was determined to be  $48.3 \pm 7.2$  % Ag (Ag-NP),  $9.8 \pm 5.5$  % Cu (CuO-NP), and  $58.1 \pm 2.6$  %  
56 Zn (ZnO-NP) (SI, Tab. S3).

57

### 58 Impact of the chemical identity of NPs with respect to ionic fractions

59 In addition to the exposure with nanomaterials, the respective ionic substances ( $\text{AgNO}_3$ ,  $\text{CuSO}_4 \cdot 5\text{H}_2\text{O}$ ,  
60  $\text{ZnSO}_4 \cdot 7\text{H}_2\text{O}$ ) were tested to allow comparing to Ag-NP, CuO-NP, and ZnO-NP results. The obtained  
61 concentrations after an exposure to 60  $\mu\text{g}$  element/l for 24 h are  $6.4 \pm 1.8$  ng/organism,  $2.1 \pm$   
62  $0.4$  ng/organism, and  $0.4 \pm 0.1$  ng/organism for  $\text{AgNO}_3$ ,  $\text{CuSO}_4 \cdot 5\text{H}_2\text{O}$ , and  $\text{ZnSO}_4 \cdot 7\text{H}_2\text{O}$ , respectively  
63 (SI, Fig. S2).

64 **Tab. S3:** Chemical and physical properties of investigated nanomaterials (powder, suspension, exposure solution).

| Nanomaterial | Characterization of powders |                         | Characterization of suspensions |                               |                                  |                       |                        | Characterization of exposure solutions (ISO water) |                                       |
|--------------|-----------------------------|-------------------------|---------------------------------|-------------------------------|----------------------------------|-----------------------|------------------------|----------------------------------------------------|---------------------------------------|
|              | X <sub>TEM</sub> (nm)       | BET (m <sup>2</sup> /g) | Concentration (g/l)             | Coating (c) / stabilizer (s)  | Smoluchovski Zeta potential (mV) | X <sub>DLS</sub> (nm) | Dissolved fraction (%) | X <sub>DLS</sub> (nm) t <sub>0</sub>               | X <sub>DLS</sub> (nm) t <sub>24</sub> |
| AgNP         | 21 ± 8                      | -                       | 4.0                             | PVP (c)                       | -19                              | 117 ± 24              | 48.3 ± 7.2             | 135                                                | 204                                   |
| AuNP         | 13 ± 1                      | -                       | 0.06                            | Sodium citrate (s)            | -38                              | 18 ± 2                | -                      | 22                                                 | > 5000                                |
| CuO-NP       | 22-25                       | 28                      | 0.09                            | Tetrasodium pyrophosphate (s) | -64                              | 132 ± 2               | 9.8 ± 5.5              | 131                                                | 420                                   |
| ZnO-NP       | 10-15                       | 60                      | 5.6                             | -                             | +34                              | 80 ± 1                | 58.1 ± 2.6             | 81                                                 | > 5000                                |

65

66

67 **Tab. S4:** Percentage distribution and concentrations measured for the zebrafish embryo and chorion structures for a 60 µg element/l exposure.

68 **RESULTS OF EXPOSURE WITH NANOPARTICLES**

| Ag-NP               |                                 |                                    |                                  |                           |                                   |                                  |                                 |
|---------------------|---------------------------------|------------------------------------|----------------------------------|---------------------------|-----------------------------------|----------------------------------|---------------------------------|
| Exposure period (h) | Concentration egg (ng/organism) | Concentration chorion (ng/chorion) | Concentration embryo (ng/embryo) | Calculated conc. PVS (ng) | Time-average 2-24 h (ng/organism) | Time-average 2-24 h (ng/chorion) | Time-average 2-24 h (ng/embryo) |
| 0.5                 | 3.07 ± 0.34                     | 1.36 ± 0.73                        | 0.08 ± 0.07                      | 1.63 ± 0.81               | 8.46 ± 1.78                       | 5.63 ± 1.38                      | 0.43 ± 0.14                     |
| 1                   | 2.37 ± 0.64                     | 1.91 ± 0.49                        | 0.20 ± 0.07                      | 0.73 ± 0.56               |                                   |                                  |                                 |
| 2                   | 5.64 ± 0.58                     | 3.59 ± 0.81                        | 0.33 ± 0.22                      | 1.73 ± 0.76               |                                   |                                  |                                 |
| 4                   | 8.22 ± 1.33                     | 5.82 ± 1.15                        | 0.65 ± 0.19                      | 1.75 ± 0.19               |                                   |                                  |                                 |
| 8                   | 10.01 ± 1.27                    | 7.49 ± 2.43                        | 0.44 ± 0.21                      | 2.08 ± 1.53               |                                   |                                  |                                 |
| 24                  | 9.95 ± 0.80                     | 5.64 ± 2.83                        | 0.31 ± 0.05                      | 4.00 ± 2.56               |                                   |                                  |                                 |

69

70

| Au-NP               |                                 |                                    |                                  |                           |                                   |                                  |                                 |
|---------------------|---------------------------------|------------------------------------|----------------------------------|---------------------------|-----------------------------------|----------------------------------|---------------------------------|
| Exposure period (h) | Concentration egg (ng/organism) | Concentration chorion (ng/chorion) | Concentration embryo (ng/embryo) | Calculated conc. PVS (ng) | Time-average 2-24 h (ng/organism) | Time-average 2-24 h (ng/chorion) | Time-average 2-24 h (ng/embryo) |
| 0.5                 | 5.46 ± 4.63                     | 1.87 ± 2.12                        | 1.05 ± 0.89                      | 3.74 ± 2.25               | 12.04 ± 7.82                      | 7.54 ± 6.69                      | 0.51 ± 0.28                     |
| 1                   | 4.66 ± 1.91                     | 1.28 ± 0.73                        | 0.98 ± 0.98                      | 2.50 ± 0.20               |                                   |                                  |                                 |
| 2                   | 5.43 ± 1.35                     | 2.44 ± 1.13                        | 0.98 ± 0.67                      | 2.60 ± 1.67               |                                   |                                  |                                 |
| 4                   | 5.84 ± 2.01                     | 3.00 ± 2.09                        | 0.38 ± 0.28                      | 4.58 ± 1.93               |                                   |                                  |                                 |
| 8                   | 12.10 ± 1.84                    | 5.80 ± 2.95                        | 0.30 ± 0.12                      | 5.99 ± 3.37               |                                   |                                  |                                 |
| 24                  | 24.79 ± 0.68                    | 18.91 ± 5.11                       | 0.38 ± 0.24                      | 5.50 ± 3.92               |                                   |                                  |                                 |

71

| CuO-NP              |                                 |                                    |                                  |                           |                                   |                                  |                                 |
|---------------------|---------------------------------|------------------------------------|----------------------------------|---------------------------|-----------------------------------|----------------------------------|---------------------------------|
| Exposure period (h) | Concentration egg (ng/organism) | Concentration chorion (ng/chorion) | Concentration embryo (ng/embryo) | Calculated conc. PVS (ng) | Time-average 2-24 h (ng/organism) | Time-average 2-24 h (ng/chorion) | Time-average 2-24 h (ng/embryo) |
| 0.5                 | 0.27 ± 0.02                     | 0.35 ± 0.11                        | 0.36 ± 0.08                      | -0.53 ± 0.04              | 0.92 ± 0.12                       | 0.58 ± 0.11                      | 0.42 ± 0.10                     |
| 1                   | 0.42 ± 0.04                     | 0.35 ± 0.10                        | 0.43 ± 0.13                      | -0.35 ± 0.06              |                                   |                                  |                                 |
| 2                   | 0.45 ± 0.03                     | 0.64 ± 0.25                        | 0.38 ± 0.08                      | -0.56 ± 0.33              |                                   |                                  |                                 |
| 4                   | 0.99 ± 0.28                     | 0.47 ± 0.08                        | 0.45 ± 0.17                      | 0.62 ± 0.00               |                                   |                                  |                                 |
| 8                   | 0.78 ± 0.07                     | 0.57 ± 0.07                        | 0.34 ± 0.00                      | 0.18 ± 0.00               |                                   |                                  |                                 |
| 24                  | 1.47 ± 0.09                     | 1.10 ± 0.05                        | 0.54 ± 0.14                      | 0.77 ± 0.00               |                                   |                                  |                                 |

| ZnO-NP              |                                 |                                    |                                  |                           |                                   |                                  |                                 |
|---------------------|---------------------------------|------------------------------------|----------------------------------|---------------------------|-----------------------------------|----------------------------------|---------------------------------|
| Exposure period (h) | Concentration egg (ng/organism) | Concentration chorion (ng/chorion) | Concentration embryo (ng/embryo) | Calculated conc. PVS (ng) | Time-average 2-24 h (ng/organism) | Time-average 2-24 h (ng/chorion) | Time-average 2-24 h (ng/embryo) |
| 0.5                 | 3.19 ± 0.15                     | 0.28 ± 0.03                        | 2.71 ± 0.17                      | 0.40 ± 0.15               | 3.75 ± 0.13                       | 0.51 ± 0.14                      | 2.78 ± 0.36                     |
| 1                   | 3.34 ± 0.09                     | 1.06 ± 0.23                        | 2.90 ± 0.18                      | -0.61 ± 0.47              |                                   |                                  |                                 |
| 2                   | 3.76 ± 0.30                     | 0.63 ± 0.09                        | 2.79 ± 0.15                      | 0.67 ± 0.16               |                                   |                                  |                                 |
| 4                   | 3.57 ± 0.13                     | 0.37 ± 0.08                        | 3.36 ± 0.08                      | 0.00 ± 0.00               |                                   |                                  |                                 |
| 8                   | 3.75 ± 0.82                     | 0.69 ± 0.13                        | 2.55 ± 0.91                      | 1.01 ± 0.31               |                                   |                                  |                                 |
| 24                  | 3.94 ± 1.22                     | 0.38 ± 0.07                        | 2.42 ± 0.71                      | 1.15 ± 0.69               |                                   |                                  |                                 |

## 72 RESULTS OF EXPOSURE WITH IONIC SUBSTANCES

| AgNO <sub>3</sub>   |                                 |                                    |                                  |                           |                                   |                                  |                                 |
|---------------------|---------------------------------|------------------------------------|----------------------------------|---------------------------|-----------------------------------|----------------------------------|---------------------------------|
| Exposure period (h) | Concentration egg (ng/organism) | Concentration chorion (ng/chorion) | Concentration embryo (ng/embryo) | Calculated conc. PVS (ng) | Time-average 2-24 h (ng/organism) | Time-average 2-24 h (ng/chorion) | Time-average 2-24 h (ng/embryo) |
| 0.5                 | 1.13 ± 0.28                     | 0.82 ± 0.24                        | 0.12 ± 0.05                      | 0.65 ± 0.00               | 4.57 ± 1.17                       | 1.80 ± 0.36                      | 0.22 ± 0.09                     |
| 1                   | 1.54 ± 0.13                     | 1.46 ± 0.41                        | 0.31 ± 0.30                      | 0.38 ± 0.00               |                                   |                                  |                                 |
| 2                   | 3.55 ± 0.83                     | 1.58 ± 0.93                        | 0.23 ± 0.07                      | 1.75 ± 0.33               |                                   |                                  |                                 |
| 4                   | 3.81 ± 0.51                     | 1.33 ± 0.54                        | 0.12 ± 0.05                      | 2.36 ± 0.77               |                                   |                                  |                                 |
| 8                   | 4.41 ± 1.37                     | 2.08 ± 1.91                        | 0.18 ± 0.19                      | 3.97 ± 0.12               |                                   |                                  |                                 |
| 24                  | 6.52 ± 1.76                     | 2.22 ± 1.42                        | 0.36 ± 0.29                      | 3.94 ± 1.35               |                                   |                                  |                                 |

73

| CuSO <sub>4</sub> *5H <sub>2</sub> O |                                 |                                    |                                  |                           |                                   |                                  |                                 |
|--------------------------------------|---------------------------------|------------------------------------|----------------------------------|---------------------------|-----------------------------------|----------------------------------|---------------------------------|
| Exposure period (h)                  | Concentration egg (ng/organism) | Concentration chorion (ng/chorion) | Concentration embryo (ng/embryo) | Calculated conc. PVS (ng) | Time-average 2-24 h (ng/organism) | Time-average 2-24 h (ng/chorion) | Time-average 2-24 h (ng/embryo) |
| 0.5                                  | 1.77 ± 0.11                     | 1.42 ± 0.20                        | 0.50 ± 0.04                      | 0.34 ± 0.00               | 2.74 ± 0.50                       | 2.20 ± 0.50                      | 0.25 ± 0.09                     |
| 1                                    | 1.67 ± 0.16                     | 1.32 ± 0.22                        | 0.44 ± 0.66                      | 0.50 ± 0.07               |                                   |                                  |                                 |
| 2                                    | 1.93 ± 0.04                     | 1.39 ± 0.19                        | 0.16 ± 0.09                      | 0.90 ± 0.63               |                                   |                                  |                                 |
| 4                                    | 2.81 ± 0.43                     | 2.20 ± 0.13                        | 0.40 ± 0.34                      | 1.07 ± 1.11               |                                   |                                  |                                 |
| 8                                    | 2.89 ± 0.21                     | 2.51 ± 0.46                        | 0.24 ± 0.09                      | 0.49 ± 0.14               |                                   |                                  |                                 |
| 24                                   | 3.32 ± 0.42                     | 2.69 ± 0.67                        | 0.21 ± 0.09                      | 0.87 ± 0.71               |                                   |                                  |                                 |

74

75

76

ZnSO<sub>4</sub>\*7H<sub>2</sub>O

| Exposure period (h) | Concentration egg (ng/organism) | Concentration chorion (ng/chorion) | Concentration embryo (ng/embryo) | Calculated conc. PVS (ng) | Time-average 2-24 h (ng/organism) | Time-average 2-24 h (ng/chorion) | Time-average 2-24 h (ng/embryo) |
|---------------------|---------------------------------|------------------------------------|----------------------------------|---------------------------|-----------------------------------|----------------------------------|---------------------------------|
| 0.5                 | 3.20 ± 0.29                     | 0.87 ± 0.10                        | 2.47 ± 0.23                      | 0.47 ± 0.08               | 2.35 ± 0.28                       | 0.35 ± 0.16                      | 2.95 ± 0.28                     |
| 1                   | 3.20 ± 0.54                     | 0.78 ± 0.26                        | 2.37 ± 0.50                      | 0.36 ± 0.10               |                                   |                                  |                                 |
| 2                   | 2.27 ± 0.16                     | 0.61 ± 0.41                        | 1.75 ± 0.26                      | 0.37 ± 0.00               |                                   |                                  |                                 |
| 4                   | 2.53 ± 0.34                     | 0.26 ± 0.01                        | 2.06 ± 0.26                      | 1.30 ± 0.00               |                                   |                                  |                                 |
| 8                   | 2.67 ± 0.32                     | 0.45 ± 0.18                        | 1.64 ± 0.10                      | 0.57 ± 0.42               |                                   |                                  |                                 |
| 24                  | 1.92 ± 0.10                     | 0.07 ± 0.03                        | 2.35 ± 0.78                      | 0.01 ± 0.00               |                                   |                                  |                                 |

77

78 **Tab. S5:** Internal concentrations of the respective metals in the different zebrafish embryo compartments.

| Metal            | Egg (ng/μl) | Chorion (ng/μl) | Embryo (ng/μl) | Calculated conc. PVS (ng/μl) |
|------------------|-------------|-----------------|----------------|------------------------------|
| nAg              | 820.57      | 6.44            | 13.82          | 14.26                        |
| Ag <sup>+</sup>  | 268.65      | 6.46            | 1.22           | 7.81                         |
| nAu              | 1544.79     | 12.17           | 1.54           | 26.35                        |
| nCuO             | 94.69       | 0.19            | 2.29           | 1.60                         |
| Cu <sup>2+</sup> | 324.79      | 0.75            | 1.01           | 4.43                         |
| nZnO             | 66.43       | 1.76            | 11.27          | 5.49                         |
| Zn <sup>2+</sup> | 32.79       | 0.07            | 9.08           | 3.28                         |

79

80

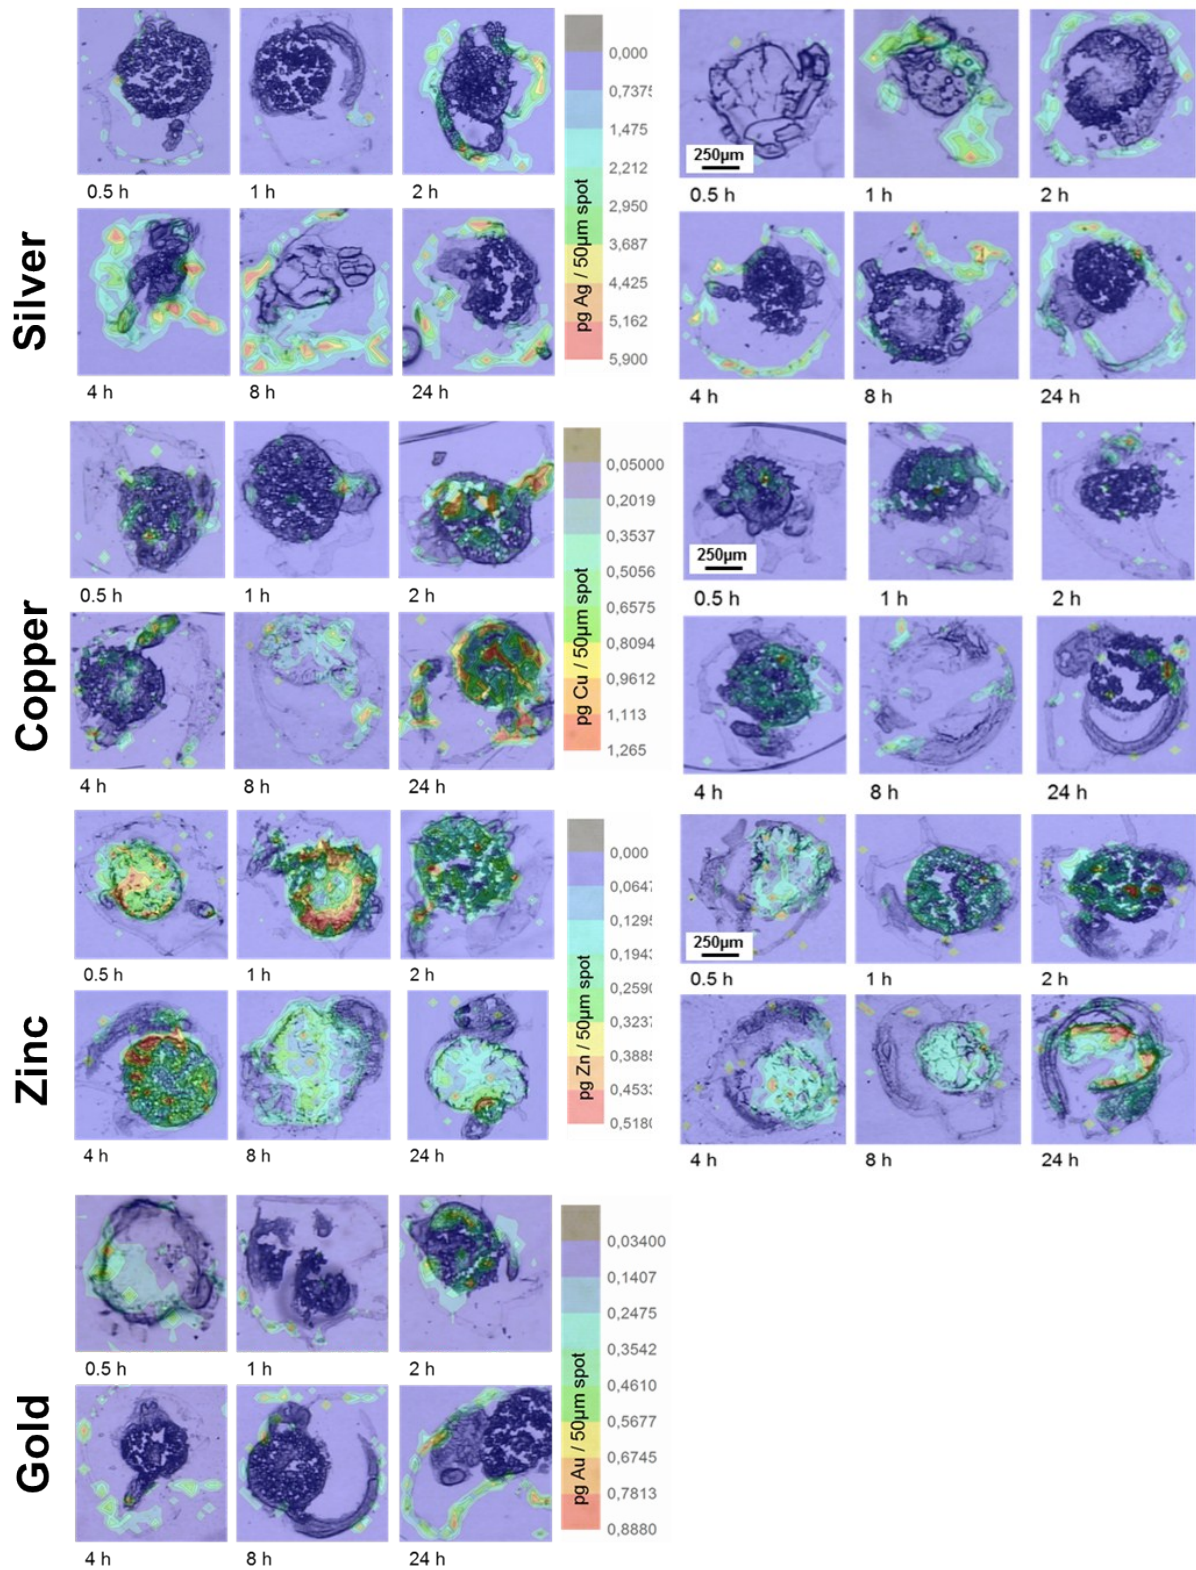

81

82 **Fig. S2:** Visualization of the time course of metal accumulation for nanoparticles and the respective ions after  
 83 determination of the elemental distribution by LA-ICP-MS (right column: nanoparticles, left column: metal ions)

84

85 **References**

86



87 NanoValid, EU-project (2015). Dispersion of NNV-011 (CuO) nanoparticle suspensions for  
88 toxicological testing.

89
